# Supplementary material for: A Bibliometric Analysis of Electrospun Nanofibers for Dentistry
Source: MDPI journal article supplement (doi:10.3390/jfb13030090), 2022-07-09
Supplement: s1 [file s1]

Table S1. Full spellings of the Abbreviations in Figure 8.

| Full spellings                                    | Abbreviations |
|---------------------------------------------------|---------------|
| Acrylonitrile–butadiene–styrene                   | ABS           |
| Amorphous calcium phosphate                       | ACP           |
| Alpha-tricalcium phosphate                        | Alpha-TCP     |
| Beta-cyclodextrin                                 | Beta-CD       |
| Beta-tricalcium phosphate                         | Beta-TCP      |
| Hydroxypropyl- $\beta$ -cyclodextrin              | HP beta CD    |
| Polyamide 6                                       | Nylon 6       |
| Polyamide 6                                       | Nylon 66      |
| Poly (vinylidene fluoride-tetrafluoroethylene)    | P(VDF-TeFE)   |
| Poly(4-vinylpyridine)                             | P4VP          |
| Polyamide                                         | PA            |
| Polyacrylonitrile                                 | PAN           |
| Polyaniline                                       | PANI          |
| Polybutylene succinate                            | PBS           |
| Poly (butylene succinate-co- glycolate)           | PBSGL         |
| Polycarboxylate                                   | PCE           |
| Polycaprolactone                                  | PCL           |
| Polycarbonate polyurethane                        | PCNU          |
| Polycarbonate urethanes                           | PCU           |
| Poly D-lactic acid                                | PDLA          |
| Poly l-lactide-co-d, l-lactide                    | PDLLA         |
| Poly (D, L-lactide-co-epsilon-caprolactone)       | PDLLCL        |
| Polydioxanone                                     | PDS           |
| Polyethylene glycol                               | PEG           |
| Polyetherimide                                    | PEI           |
| Poly (ethylene 2,6 naphthalate)                   | PEN           |
| Polyethylene oxide                                | PEO           |
| Polyglycolic acid                                 | PGA           |
| Poly (glycerol-sebacate)                          | PGS           |
| Poly (3-hydroxybutyrate)                          | PHB           |
| Poly (3-hydroxybutyrate-co-3-hydroxyvalerate)     | PHBV          |
| Poly lactic acid                                  | PLA           |
| Poly (l-lactide-co- $\epsilon$ -caprolactone)     | PLC           |
| Poly (l-lactic acid-co- $\epsilon$ -caprolactone) | PLCL          |
| Poly (lactic-co-glycolic acid)                    | PLGA          |

---

|                                              |                  |
|----------------------------------------------|------------------|
| Poly (lactic acid-co-lysine)                 | PLL              |
| Poly L-lactic acid                           | PLLA             |
| Poly-l-Ornithine                             | PLO              |
| Polymethyl methacrylate                      | PMMA             |
| Polystyrene                                  | PS               |
| Polyurethane                                 | PU               |
| Polyvinyl alcohol                            | PVA              |
| Polyvinyl acetate                            | PVAc             |
| Polyvinylidene difluoride                    | PVDF             |
| Poly (lactic acid)/Hybrid                    | PVH              |
| Poly (vinyl alcohol)                         | PVOH             |
| Polyvinylpyrrolidone                         | PVP              |
| Silicon dioxide                              | SiO <sub>2</sub> |
| Sulfonated poly (ether ether ketone)         | SPEEK            |
| Titanium dioxide                             | TiO <sub>2</sub> |
| D-α-Tocopherol polyethylene glycol succinate | TPGS             |
| Tricalcium phosphate                         | TCP              |
| Water Polyurethane                           | WPU              |

---
